# Supplementary material
Source: Elsevier journal article supplement (https://www.sciencedirect.com/science/article/pii/S0001731020300016)
Supplement: mmc1 [file S0001731020300016:mmc1.pdf]

## Apartado 1.- Resumen de los pasos para adaptar GPC

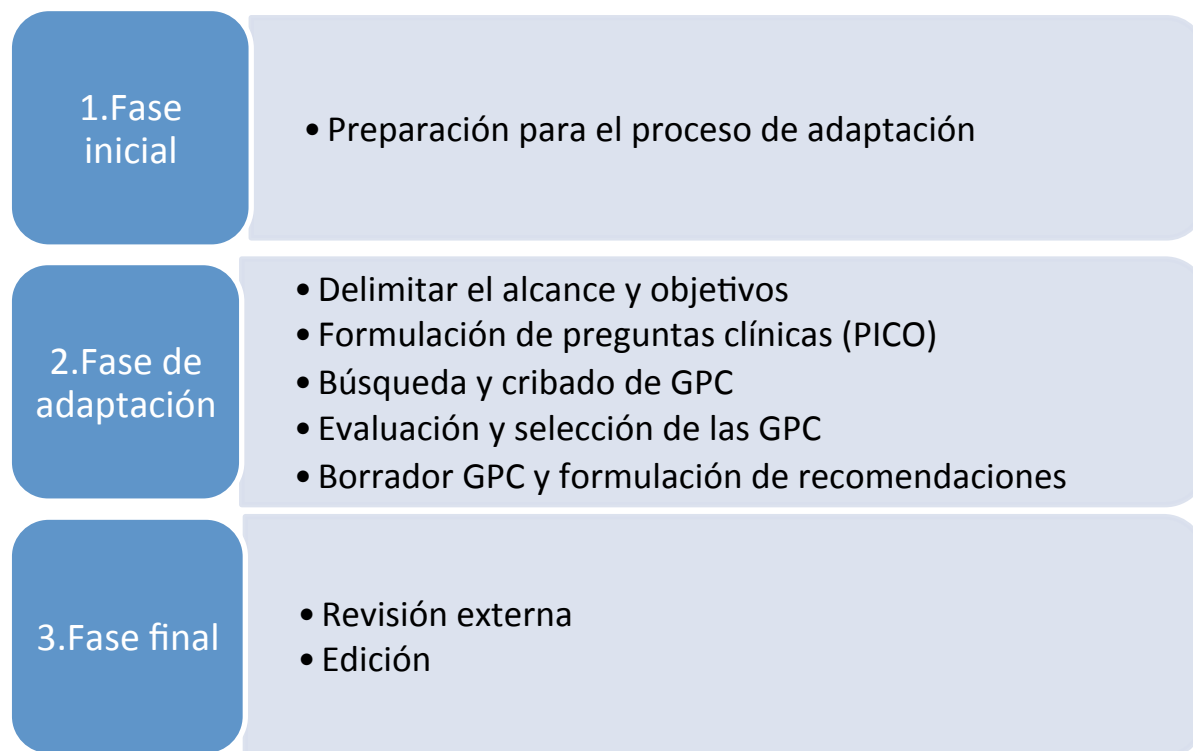

### 1. FASE INICIAL

#### 1.1. Preparación para el proceso de adaptación

Comprobar que la adaptación es factible para un tema específico y establecer un comité organizador con sus grupos de trabajo. Delimitar un calendario de reuniones y un plan de trabajo que perfile el proceso de adaptación a seguir. El plan debe incluir un cronograma para completar el proceso y fecha de finalización.

### 2. FASE ADAPTACIÓN

#### 2.1. Delimitar el alcance y objetivos

En este apartado se explica la necesidad de definir desde el principio la perspectiva en que se sitúa la GPC, el ámbito sanitario de aplicación y el motivo que lleva a su realización, respondiendo a las preguntas: ¿Por qué se hace? ¿Para qué? ¿A qué profesionales se dirige la guía? y ¿A qué pacientes?

#### 2.2. Formulación de preguntas clínicas (PICO)

El objetivo de este apartado es elaborar el listado completo de preguntas clínicas que desarrollen el tema que aborde la guía. La respuesta a estas preguntas ayudará a los usuarios de la guía de práctica clínica a tomar las diferentes decisiones que se plantean al intentar tratar el problema objeto de la guía.

#### 2.3. Búsqueda y cribado de GPC

La búsqueda de GPC se realiza a través de internet entrando en las direcciones de los organismos recopiladores (NGC o NeLH o Guíasalud, entre otros) o elaboradores de guías (NICE o SIGN o Academias Dermatológicas entre otros). La estrategia de búsqueda y cribado

debería estar basada en las preguntas claves. Una forma de reducir el número de GPC para su adaptación final es utilizando el instrumento AGREE.

#### **2.4. Evaluación y selección de las GPC**

Es necesario evaluar las GPC respecto a su calidad, vigencia, contenido, consistencia, aceptabilidad y la aplicabilidad de las recomendaciones. Después con los resultados del módulo de evaluación se tendrá una base para la toma de decisiones informada y transparente alrededor de la selección y modificación de las GPC fuente.

#### **2.5. Borrador GPC y formulación de recomendaciones**

Los grupos continúan con su trabajo hasta la redacción de un borrador con las recomendaciones que respondan a las preguntas formuladas. Lo más adecuado es que todos los miembros del grupo revisen este conjunto de recomendaciones. Además hay que incluir en el borrador el detalle sobre el proceso seguido. La idea es tener un documento que respete las necesidades de los usuarios finales y ofrezca una explicación transparente y detallada del proceso.

### **3. FASE FINAL**

#### **3.1. Revisión externa**

Se recomienda que la GPC sea revisada por la población objeto, incluyendo los sanitarios que utilizarían la GPC en la práctica y cualquier paciente afectado por la GPC, así como los responsables políticos, tomadores de decisiones, representantes de organizaciones y administradores. También se aconseja que sea revisada por organismos avalados o los desarrolladores de las GPC fuente.

#### **3.2. Edición**

El producto final de GPC debe ser fácilmente accesible, debe ser claro y sin ambigüedades. Se recomienda incluir los algoritmos, las vías de atención, listas de control, y el material de información de los pacientes.

## Apartado 2.- Alcance y Objetivo de la Guía

### 1. Título de la Guía:

Carcinoma basocelular cutáneo: diagnóstico y tratamiento en atención especializada dermatológica

#### 1.1. Título Abreviado

Carcinoma Basocelular

### 2. Antecedentes

- a. El carcinoma basocelular constituye el 80-90% de todos los cánceres cutáneos y es el tumor más frecuente en humanos.
- b. Provoca morbilidad funcional y cosmética por su agresividad local. Su tratamiento supone un importante costo económico. Presenta mínimo potencial metastatizante y escasa mortalidad asociada.
- c. La incidencia del carcinoma basocelular va en aumento, por motivos que podrían incluir una mayor exposición a la radiación UV, un aumento de las actividades realizadas al aire libre, cambios en la forma de vestirse, la mayor esperanza de vida, el uso de cabinas de autobronceado y la disminución de la capa de ozono.
- d. Existen numerosas alternativas terapéuticas para el carcinoma basocelular, con variabilidad en la práctica clínica y con grandes diferencias de coste según el tratamiento aplicado. La investigación comparativa de estos tratamientos entre sí es escasa.

### 3. Necesidad clínica de una guía

- a. En la atención al paciente con carcinoma basocelular existen numerosas técnicas disponibles, probablemente una importante variabilidad y puede ser difícil priorizar las más adecuadas. La elección del tratamiento óptimo del carcinoma basocelular es compleja y debe adaptarse tanto a las características del paciente (estado general, patología concomitante, edad...) como a las del propio tumor (histología, localización, recidivas, tratamientos previos...). Además han aparecido recientemente nuevas opciones terapéuticas cuya indicación aún no está totalmente clara.

- b. Existen guías de tratamiento previas (Británica, europea y otras), pero han sido realizadas en otros países y podrían no ser extrapolables a nuestra población por motivos prácticos o de la organización de la asistencia
- c. La intención es poder ofrecer una guía de diagnóstico y tratamiento que ayude a los dermatólogos en España a mejorar el diagnóstico, tratamiento y seguimiento de los pacientes con carcinoma basocelular.

#### **4. La guía**

- a. El proceso de desarrollo de la guía se basará en el método ADAPTE, que se describe en un documento aparte.
- b. Este documento es el alcance, donde sus autores definen con precisión qué es lo que se abordará y lo que no se abordará en la guía. El alcance está basado en la solicitud de la AEDV.
- c. Las áreas tratadas por la guía se describen en las secciones siguientes.

##### **4.1. Población**

###### **4.1.1. Grupos que se consideran**

Pacientes con carcinoma basocelular vistos en atención especializada.

###### **4.1.2. Grupos que no se toman en consideración**

Síndrome de Gorlin y otros síndromes de tumores múltiples

###### **4.1.3. Aspectos clínicos que no están cubiertos**

Las estrategias de prevención.

##### **4.2. Ámbito asistencial**

- a. La guía cubrirá la asistencia que los dermatólogos prestan a estos pacientes en España, independientemente del sistema sanitario en el que se produzca la asistencia (privada/pública).

##### **4.3. Proceso asistencial**

La guía examinará el diagnóstico de los pacientes, estadiaje o clasificación según riesgo de recurrencia/extensión, su tratamiento y su seguimiento posterior.

La guía revisará evidencias científicas sobre estos aspectos, incluyendo cuestiones relativas a los métodos de diagnóstico disponibles habitualmente, a los tratamientos médicos y quirúrgicos y al seguimiento de estos pacientes.

#### **4.4. Soporte para auditoria en la guía**

La guía incorporará criterios de revisión y consejos para auditoría.

#### **4.5. Estatus**

##### **4.5.1. Alcance**

Esta es la versión final del alcance.

##### **4.5.2. Guía**

El desarrollo de las recomendaciones de la guía empezará en junio de 2016.

#### **5. Información adicional**

Se pretende la publicación de las guías en la revista Actas Dermo-Sifiliográficas para su difusión.

### Apartado 3.- Algoritmo manejo clínico

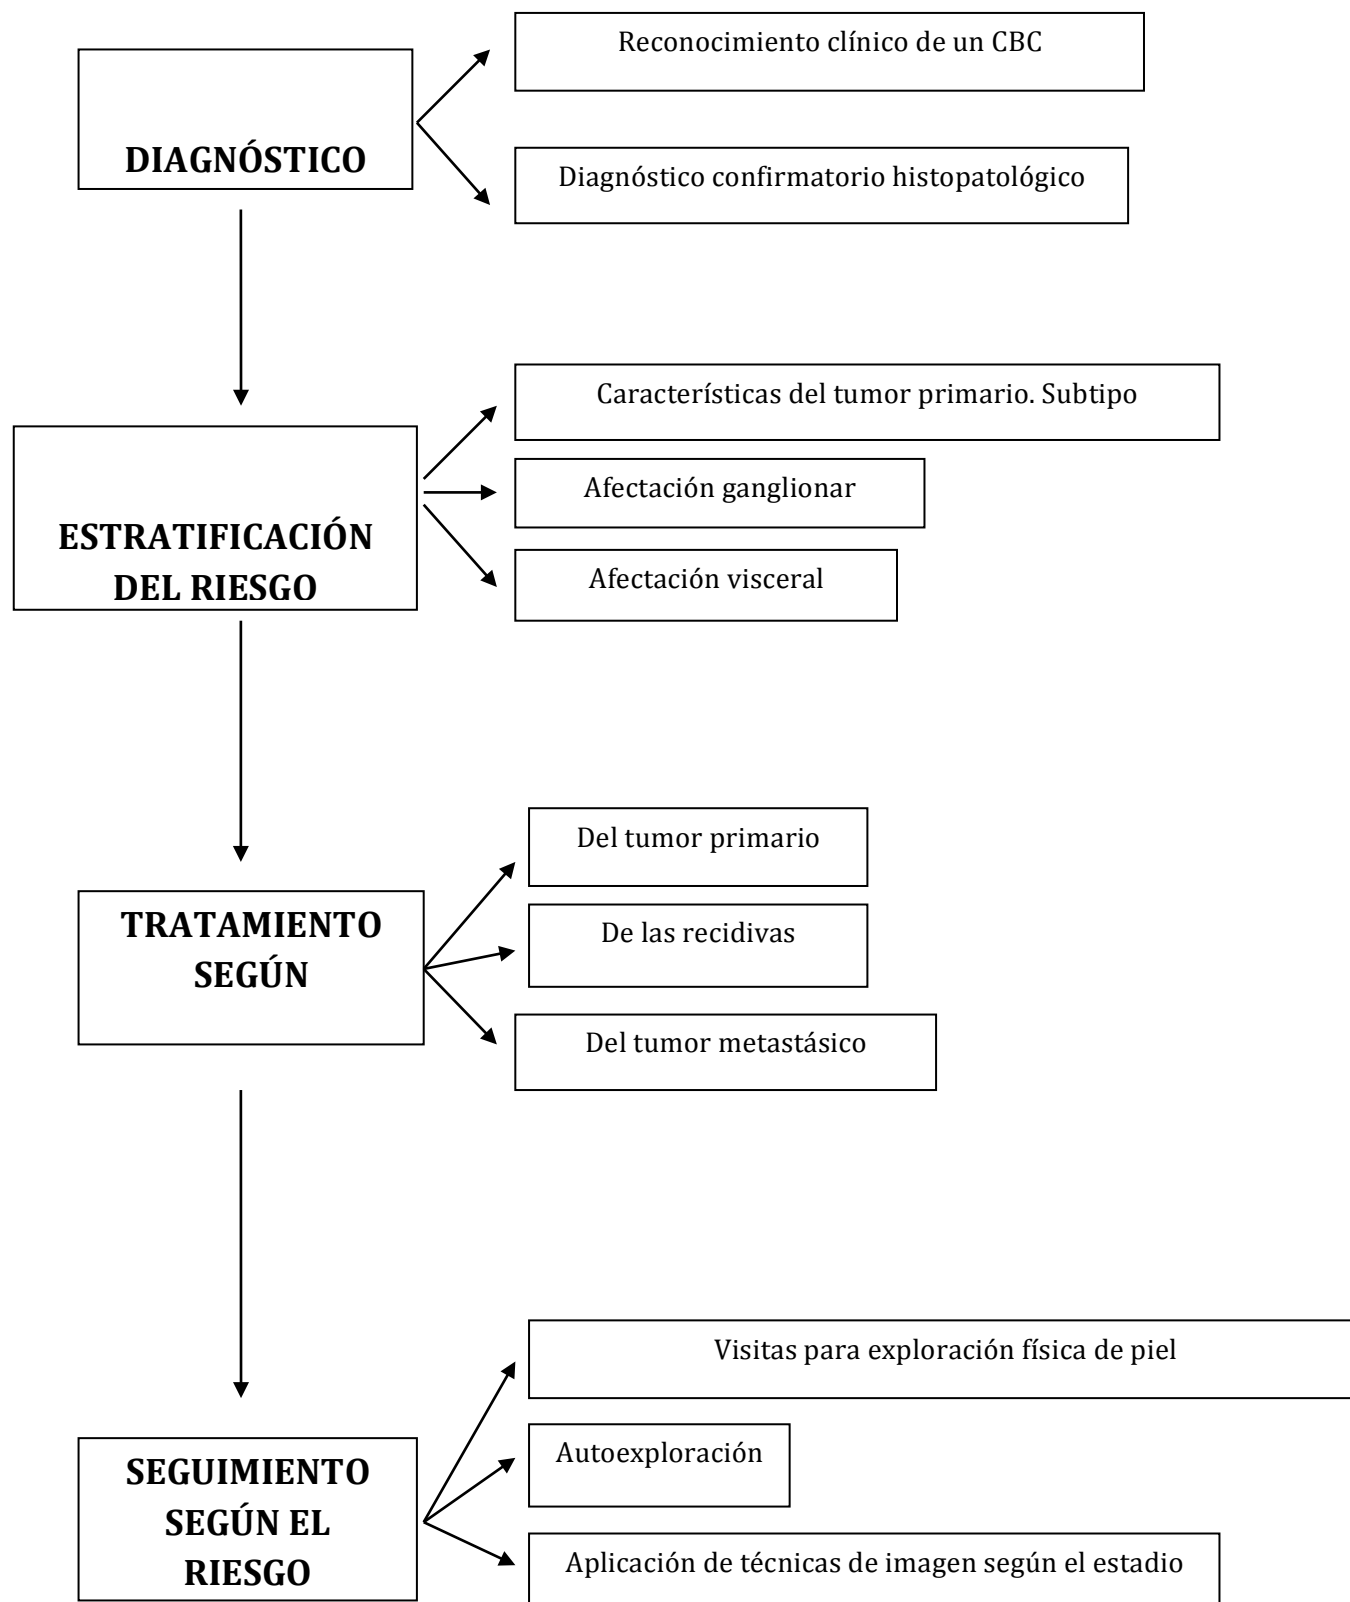

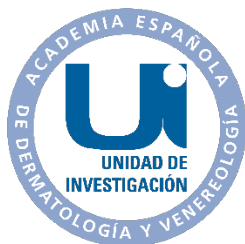

Fundación  
Piel Sana

2018

# Guía de Práctica Clínica de la AEDV para el carcinoma basocelular

TEXTO COMPLETO. 11/10/2018

## Autores:

*Francisco Vélchez-Márquez*

Servicio de Dermatología. Hospital de Guadix. Granada, España

*Paloma Borregón Nofuentes*

Servicio de Dermatología. Clínica Beteré-Marcos. Madrid, España.

*Lucía Barchino Ortiz*

Servicio de Dermatología. Hospital General Universitario Gregorio Marañón. Madrid, España.

*Andrés Ruíz de Casas*

Servicio de Dermatología. Hospital Universitario Virgen Macarena. Sevilla, España.

*Irene Palacios Álvarez*

Servicio de Dermatología. Clínica Universidad de Navarra. Pamplona, España.

*Ainara Soria Rivas*

Servicio de Oncología. Hospital Universitario Ramón y Cajal. Madrid, España.

*Miguel Ángel Descalzo-Gallego*

Unidad de Investigación. Fundación Piel Sana Academia Española de Dermatología y Venereología. Madrid, España.

*Ignacio García-Doval*

Unidad de Investigación. Fundación Piel Sana Academia Española de Dermatología y Venereología. Madrid, España.

Servicio de Dermatología. Complejo Hospitalario Universitario de Vigo. Vigo, España.

*Luis Ríos-Buceta*

Servicio de Dermatología. Hospital Universitario Ramón y Cajal. Madrid, España.

*Pedro Redondo-Bellón*

Servicio de Dermatología. Clínica Universidad de Navarra. Pamplona, España.

## Tabla de contenido

|                                                                                                                                                                                                                                                                                                                               |    |
|-------------------------------------------------------------------------------------------------------------------------------------------------------------------------------------------------------------------------------------------------------------------------------------------------------------------------------|----|
| Autores:.....                                                                                                                                                                                                                                                                                                                 | 1  |
| Introducción .....                                                                                                                                                                                                                                                                                                            | 5  |
| Método empleado para la preparación del documento:.....                                                                                                                                                                                                                                                                       | 6  |
| PREGUNTA 2. ¿En pacientes con carcinoma basocelular con afectación de márgenes quirúrgicos la radioterapia coadyuvante comparada con la reintervención quirúrgica disminuye la probabilidad de recidiva?.....                                                                                                                 | 10 |
| PREGUNTA 3. ¿En pacientes con carcinoma basocelular de bajo riesgo los tratamientos no quirúrgicos comparados con la cirugía influyen en la probabilidad de recidiva?.....                                                                                                                                                    | 12 |
| PREGUNTA 4. ¿En pacientes con carcinoma basocelular de alto riesgo la cirugía de Mohs en comparación con la cirugía convencional disminuye la probabilidad de recidiva? .....                                                                                                                                                 | 16 |
| PREGUNTA 5. ¿En pacientes inmunodeprimidos con carcinoma basocelular de bajo riesgo el tratamiento agresivo en comparación con el tratamiento conservador Influye en la probabilidad de recidiva? .....                                                                                                                       | 19 |
| PREGUNTA 6. ¿En pacientes con carcinoma basocelular localmente avanzado el tratamiento con vismodegib en comparación con la radioterapia produce alguna mejoría de la supervivencia global o supervivencia libre de enfermedad .....                                                                                          | 22 |
| PREGUNTA 7. ¿En pacientes con carcinoma basocelular localmente avanzado e inoperable por complejidad quirúrgica, el tratamiento neoadyuvante con vismodegib en comparación con la radioterapia permite un rescate quirúrgico, o una reducción del escalón de complejidad de la cirugía que haga viable la intervención? ..... | 24 |
| PREGUNTA 8. ¿En pacientes con carcinoma basocelular de alto riesgo el seguimiento protocolizado en comparación con el seguimiento a demanda del paciente facilita un diagnóstico precoz en caso de recidiva? .....                                                                                                            | 27 |
| PREGUNTA 9. ¿En pacientes con carcinoma basocelular de bajo riesgo el seguimiento protocolizado en comparación con el alta y seguimiento a demanda facilita un diagnóstico precoz en caso de recidiva? .....                                                                                                                  | 30 |

|                                                                                                                                                                                                                                                      |    |
|------------------------------------------------------------------------------------------------------------------------------------------------------------------------------------------------------------------------------------------------------|----|
| PREGUNTA 10. ¿En pacientes con carcinoma basocelular de bajo riesgo tratado con técnicas no quirúrgicas el seguimiento protocolizado en comparación con la consulta a demanda del paciente facilita un diagnóstico precoz en caso de recidiva? ..... | 33 |
| PREGUNTA 11. ¿En pacientes con diagnóstico previo de carcinoma basocelular el seguimiento protocolizado en comparación con la consulta a criterio del paciente facilita un diagnóstico precoz en caso de nuevos carcinomas basocelulares? .....      | 35 |
| BIBLIOGRAFIA.....                                                                                                                                                                                                                                    | 39 |

## Introducción

Los tumores cutáneos son muy frecuentes en nuestro medio. La incidencia del carcinoma basocelular es de 253,23 tumores (IC 95%: 273,01-69,45)/100.000 personas-año y es posible que este aumentando.<sup>1</sup> El carcinoma basocelular constituye el 80-90% de todos los cánceres cutáneos y es el tumor más frecuente en humanos. Ocasiona importante repercusión en la calidad de vida, con morbilidad funcional y estética, y supone una importante carga de trabajo para los dermatólogos y el sistema de salud.<sup>2</sup> Existen numerosas alternativas terapéuticas para el carcinoma basocelular, algunas de ellas nuevas, con variabilidad en la práctica clínica y con grandes diferencias de coste según el tratamiento aplicado. Estos factores hacen más compleja la toma de decisiones clínicas.

Existen guías de práctica clínica para el cuidado del carcinoma basocelular, pero en contextos diferentes y con una cobertura parcial de los problemas que los dermatólogos han identificado como principales.

Por ello, la Fundación Piel Sana AEDV, ha impulsado la adaptación de Guías de Práctica Clínica (GPC) sobre los principales tumores cutáneos, formando parte del proyecto *Libro Blanco del Cáncer Cutáneo*.

El objetivo de esta guía es mejorar la calidad asistencial de los pacientes con carcinoma basocelular, utilizando recomendaciones adaptadas a nuestro medio y basadas en la mejor evidencia posible.

El presente manuscrito es una versión resumida de la guía original. La guía completa se puede consultar en el apartado de “material suplementario”.

## Método empleado para la preparación del documento:

Al existir GPC previas, hemos optado por adaptarlas, empleando el método ADAPTE. El resumen de los pasos empleados está disponible como material suplementario <sup>3,4</sup> (material suplementario-apartado 1).

Los paneles se seleccionaron atendiendo a su experiencia en el tratamiento de estos tumores e interés en participar en la GPC, entre los miembros del Grupo Español de Dermato-Oncología y Cirugía de la AEDV (GEDOC). Todos los panelistas declararon sus conflictos de interés antes de iniciar su participación.

En el documento de alcance y objetivos se estableció como objetivo de la guía el aportar indicaciones sobre aspectos controvertidos del diagnóstico, los tratamientos médicos y quirúrgicos y el seguimiento de estos pacientes (material suplementario-apartado 2). El ámbito asistencial de la GPC es la asistencia dermatológica en España, siendo los usuarios diana los dermatólogos. Se excluyeron del ámbito de la GPC la prevención del carcinoma basocelular y los pacientes con síndromes de tumores múltiples.

En los pasos siguientes, y siguiendo el método ADAPTE, se resumió el proceso de atención y se formularon preguntas clínicas relevantes para cada uno de los pasos del algoritmo (material suplementario-apartado 3). Las preguntas más relevantes se seleccionaron mediante consenso en una reunión presencial en la sede de la AEDV en octubre de 2016. Paralelamente las guías fueron buscadas en páginas web o en fuentes u organizaciones específicas como aquellas que se dedican a recopilarlas, elaborarlas o difundirlas, además de las principales academias de dermatología o cáncer (como por ejemplo National Guidelines Clearinghouse, Guidelines International Network, Guíasalud, Institute for Clinical Systems Improvement, NICE, New Zealand Guidelines Group, Scottish Guidelines Network, Cochrane library, British Academy of Dermatology, American Academy of Dermatology, European Academy of Dermatology, NCCN). Las guías fueron posteriormente revisadas y evaluadas por su calidad metodológica empleando el instrumento AGREE II.<sup>5</sup> Se seleccionaron para su consulta las GPC con mejores resultados.

A partir de esta información se generaron las recomendaciones. En ellas se mantuvo la referencia a la fuente original. Las extracciones, el nivel de evidencia y grado de fuerza de la recomendación empleando los niveles del Centro de Medicina Basada en la Evidencia de Oxford, se realizaron siempre por pares.<sup>6</sup>

Una vez finalizado el borrador de las recomendaciones se publicaron en la web de la AEDV (<https://aedv.es/revision-de-las-recomendaciones-de-la-gpc-basocelular/>) y se sometieron a revisión externa: siendo solicitada la revisión de todos los miembros de la AEDV, miembros del GEDOC, oncólogos, e industria farmacéutica con interés en el tema. Las objeciones de los revisores fueron consideradas por los panelistas y, si se consideraron adecuadas, aplicadas a la GPC.

PREGUNTA 1.¿En pacientes con carcinoma basocelular con afectación de bordes quirúrgicos la reintervención quirúrgica comparada con la observación disminuye la probabilidad de recidiva?

## **RESUMEN DE LA EVIDENCIA**

La afectación de márgenes de exéresis se asocia a una mayor tasa de recurrencia tras la cirugía, sobre todo en tumores que afectan a región centrofacial, subtipos histológicos de alto riesgo (morfeiforme, micronodular, infiltrante) y cuando el margen afectado es el profundo. Por tanto es preferible reintervenir a vigilar la evolución.<sup>7-14</sup>

**Nivel de evidencia: 2a**

## **RECOMENDACIÓN DE LA AEDV**

Se recomienda volver a tratar los carcinomas basocelulares extirpados de manera incompleta, sobre todo si existe afectación de la zona media facial, si el margen profundo se encuentra afecto, si se han empleado colgajos locales o injertos en el cierre del defecto quirúrgico, o si el subtipo histológico es de alto riesgo. La modalidad terapéutica de elección es la cirugía convencional o la cirugía micrográfica de Mohs (especialmente indicada si se cumplen los supuestos previamente mencionados). La radioterapia estaría indicada en aquellos tumores no candidatos a cirugía. Así mismo, podría valorarse revisión clínica en tumores pequeños no agresivos localizados en tronco.

**Fuerza de recomendación: B.**

## DISCUSIÓN

Las recidivas de tumores incompletamente extirpados se han descrito en series de casos, cohortes retrospectivas o pequeñas cohortes prospectivas y no serían tan altas como se esperaría, con un rango de 26 a 41% después de 2 a 5 años de seguimiento, siendo máximas en las series con predominio de formas morfeiformes.<sup>7-9</sup> Se observa ausencia de neoplasia en la mitad de los carcinomas basocelulares re-extirpados tras una biopsia con márgenes afectos.<sup>10,11</sup> Algunas lesiones incompletamente extirpadas muestran variantes más agresivas cuando recidivan.<sup>12</sup>

Los datos apoyan el retratamiento del tumor, especialmente si afecta a la zona centrofacial. Se debe prestar especial atención si se han usado colgajos locales o injertos en el cierre y a aquellos con margen profundo afecto y variantes histológicas de alto riesgo.<sup>13</sup> En estas circunstancias debe considerarse la cirugía de Mohs.<sup>14</sup> Podría valorarse revisión clínica en tumores pequeños no agresivos localizados en tronco.

Las lesiones con márgenes de resección extremadamente cercanos deben ser tratados como aquellos con márgenes afectos.

PREGUNTA 2. ¿En pacientes con carcinoma basocelular con afectación de márgenes quirúrgicos la radioterapia coadyuvante comparada con la reintervención quirúrgica disminuye la probabilidad de recidiva?

## RESUMEN DE LA EVIDENCIA

No existen estudios que comparen la reintervención con la radioterapia coadyuvante en carcinoma basocelular con afectación de márgenes quirúrgicos. Las guías recomiendan como primera opción la reintervención quirúrgica, reservándose la radioterapia para aquellos pacientes no candidatos a cirugía (contraindicación, problemas quirúrgicos o rechazo por el paciente)<sup>15-</sup>

18

**Nivel de evidencia: 4**

## RECOMENDACIÓN DE LA AEDV

Se recomienda reservar la radioterapia para aquellos pacientes con carcinoma basocelular con afectación de márgenes de exéresis no candidatos a reintervención quirúrgica.

**Fuerza de recomendación: C**

## DISCUSIÓN

No hemos encontrado comparaciones entre radioterapia y reintervención en CBC con afectación de márgenes.

Aunque los datos son limitados, la radioterapia parece útil para prevenir la recidiva tumoral en aquellos casos en los que hay afectación de márgenes.<sup>15</sup>

Asimismo es efectiva en casos de recurrencia tumoral y para casos en los que la cirugía está contraindicada.<sup>16</sup>

Las recomendaciones más aproximadas del tratamiento radioterápico con las siguientes:

La Radioterapia debe reservarse para casos donde la cirugía no es posible (contraindicación, problemas quirúrgicos o rechazo por el paciente).

En estas circunstancias, las mejores indicaciones son: **CBC incompletamente extirpado**, CBC recidivante, CBC nodular de cabeza y cuello, por debajo de 2 cm y CBC con invasión de hueso o cartílago.<sup>17</sup> (Nivel de evidencia 5)

En CBC con invasión perineural, cirugía y radioterapia adyuvante (dosis media de 55 Gy) han mostrado un alto control local (97 %).<sup>18</sup>

PREGUNTA 3. ¿En pacientes con carcinoma basocelular de bajo riesgo los tratamientos no quirúrgicos comparados con la cirugía influyen en la probabilidad de recidiva?

## RESUMEN DE LA EVIDENCIA

Las tasas de recidiva son menores con cirugía convencional frente a los tratamientos no quirúrgicos por lo que estos tratamientos conservadores deberían reservarse para aquellos casos no subsidiarios de cirugía.<sup>19-21</sup> La electrocoagulación y curetaje puede ser útil como tratamiento en carcinomas basocelulares de bajo riesgo, con menor porcentaje de persistencia tumoral en aquellos carcinomas localizados en tronco y extremidades (**nivel de evidencia 4**)<sup>22-26</sup>. Igualmente, la criocirugía puede ser una buena opción terapéutica en carcinomas basocelulares de bajo riesgo (**nivel de evidencia 3b**)<sup>27-33</sup>. El tratamiento ablativo con láser CO2 y curetaje estaría especialmente indicado en carcinomas basocelulares de bajo riesgo cuando son de gran tamaño o múltiples (**nivel de evidencia 4**)<sup>34</sup>. Imiquimod es útil en carcinomas basocelulares de bajo riesgo, fundamentalmente los superficiales y en menor medida los nodulares (**nivel de evidencia 1b**)<sup>35,36</sup>. Asimismo, la terapia fotodinámica resulta útil en carcinomas basocelulares superficiales, presentando mayor tasa de recidiva en carcinomas basocelulares nodulares (**nivel de evidencia 1b**).<sup>37-42</sup> El tratamiento con 5-fluoruracilo podría ser otra opción terapéutica, si bien no existe suficiente evidencia para apoyar su uso (**nivel de evidencia 4**).

## RECOMENDACIÓN DE LA AEDV

Los tratamientos no quirúrgicos son una buena opción para el manejo del carcinoma basocelular de bajo riesgo cuando la cirugía no es posible. La electrocoagulación y curetaje es útil en tumores de bajo riesgo, sobre todo localizados en tronco y extremidades (**fuerza de la recomendación C**). Igualmente la criocirugía se puede utilizar en carcinomas basocelulares de bajo

riesgo (**fuerza de la recomendación B**). El tratamiento con láser y curetaje se puede emplear en aquellos casos de gran tamaño o cuando hay múltiples carcinomas (**fuerza de la recomendación C**). Imiquimod es una buena opción terapéutica en carcinomas basocelulares superficiales (**fuerza de la recomendación A**) y puede ser útil en los nodulares (**fuerza de la recomendación C**). La terapia fotodinámica es igualmente útil en el tratamiento del carcinoma basocelular superficial (**fuerza de la recomendación A**) y en menor medida en el nodular (**fuerza de la recomendación B**). El uso de 5-fluoruracilo también podría ser útil en el tratamiento del carcinoma basocelular de bajo riesgo (**fuerza de la recomendación C**).

## DISCUSIÓN

Todas las guías evaluadas que abordan el manejo del carcinoma basocelular (British Association of Dermatologists –BAD–, National Comprehensive Cancer Network –NCCN–, European Dermatology Forum –EDF– y European Academy of Dermatology and Venereology –EADV) están de acuerdo en que las tasas de recidiva son menores con la exéresis quirúrgica de la lesión, por lo que los tratamientos no quirúrgicos deben dejarse para carcinomas basocelulares de bajo riesgo en los que esté contraindicada o no pueda llevarse a cabo la cirugía.<sup>19-21</sup>

Si analizamos individualmente cada opción no quirúrgica extraemos las siguientes conclusiones (en todas ellas teniendo en cuenta la premisa de que se trate de casos en los que la cirugía no se puede o no se debe llevar a cabo):

**La electrocoagulación y curetaje** son una buena alternativa (nivel de evidencia 4, recomendación C) sobre todo si se trata de carcinomas basocelulares de bajo riesgo en tronco y extremidades, ya que hay series de casos y cohortes retrospectivas que demuestran persistencia tumoral en el

33% de los casos, siendo el 47% de los mismos lesiones situadas en cara y cuello.<sup>22-26</sup>

**La criocirugía** puede ser una buena alternativa terapéutica en carcinomas basocelulares de bajo riesgo, con un nivel de evidencia 3b, fuerza de recomendación B. La guía BAD recoge un estudio con tasas de curación en basocelulares de bajo riesgo a 5 años del 99%.<sup>27-33</sup>

En cuanto al **tratamiento con láser y curetaje** solo disponemos de series de casos reportados y las tasas de recurrencia son muy variables entre ellas, pero parece que sería una buena alternativa tener en cuenta cuando se trate de carcinomas basocelulares múltiples de gran tamaño, con un nivel de evidencia 4, recomendación C.<sup>34</sup>

**El Imiquimod tópico** sería una buena alternativa en lesiones pequeñas. Acorde a la evidencia disponible, Imiquimod es útil en el tratamiento del carcinoma basocelular, aunque la probabilidad de recidiva es mayor en el subtipo nodular que en el superficial (Nivel de evidencia I, Fuerza de la recomendación A). También se plantea como buena opción para combinar con otros tratamientos conservadores.<sup>35,36</sup>

**La terapia fotodinámica** es una técnica aceptable en carcinomas basocelulares de bajo riesgo pero la fuerza de la recomendación es distinta en función de si hablamos de basocelulares superficiales (fuerza de recomendación A) o nodulares (fuerza de recomendación C). Las tasas de recidiva son mayores en los tumores nodulares (nivel de evidencia 1b). Aunque la resolución de la lesión es similar inicialmente a la cirugía, en los estudios a largo plazo se observa que con el paso de los años la recurrencia es mayor que con cirugía, tanto usando MAL como ALA y sobre todo en los basocelulares nodulares.<sup>37-42</sup>

En cuanto al **5-FU tópico** podría ser otra opción terapéutica pero no existe suficiente evidencia para apoyar su uso.

PREGUNTA 4. ¿En pacientes con carcinoma basocelular de alto riesgo la cirugía de Mohs en comparación con la cirugía convencional disminuye la probabilidad de recidiva?

## **RESUMEN DE LA EVIDENCIA**

La cirugía micrográfica de Mohs tiene tasas de recurrencia menores que la cirugía convencional en tumores recurrentes (1b). Los datos en tumores primarios son más dudosos. La cirugía de Mohs estaría especialmente indicada en tumores de alto riesgo, sobre todo los localizados en región facial.<sup>43-49</sup>

**Nivel de evidencia:1b**

## **RECOMENDACIÓN DE LA AEDV**

La cirugía micrográfica de Mohs es el tratamiento más adecuado en los carcinomas basocelulares de alto riesgo, sobre todo los localizados en región facial, y recurrentes.

**Fuerza de recomendación: A**

## **DISCUSIÓN**

Una revisión narrativa que revisa todos los estudios publicados acerca de la recurrencia de carcinoma basocelular desde 1947 haya tasas de recidiva a los cinco años del 1% con cirugía de Mohs frente al 10,1% con cirugía convencional. Analizan en total 72 estudios de recurrencias a corto plazo (menos de 5 años) y 34 estudios de recurrencia a largo plazo (5 años).<sup>43</sup> (Nivel de evidencia 4)

Una cohorte prospectiva halló tasas de curación a los cinco años del 100% y del 92,2% en tumores primarios y recurrentes respectivamente, de un total de 819 pacientes con carcinoma basocelular del área periocular. Se trata de un

estudio prospectivo a 3 años (1993-1996) que incluye tumores localizados en párpado inferior (54%), canto interno (41%), y párpado superior (5%).<sup>44</sup> (Nivel de evidencia 2b)

Otro estudio de la misma cohorte, con un seguimiento de cinco años llevado a cabo en Australia, con un total de 3370 pacientes, halló tasas de recurrencia con cirugía de Mohs del 1,4% en carcinomas basocelulares primarios y del 4% en carcinomas basocelulares recidivantes, siendo los principales predictores de recidiva la recurrencia previa ( $p<0,001$ ), el mayor tiempo de evolución del tumor antes de la cirugía ( $p=0,015$ ), el subtipo infiltrante ( $p=0,13$ ) y un mayor número de pases para alcanzar márgenes libres ( $p<0,001$ ).<sup>45</sup> (Nivel de evidencia 2b)

Una cohorte retrospectiva con un total de 620 pacientes con 720 carcinomas basocelulares tratados con cirugía de Mohs entre los años 1992 y 1999 determina una tasa de recurrencia a los cinco años del 3,2% en tumores primarios y del 6,7% en tumores recidivantes, estimando como factores de mal pronóstico, los subtipos histopatológicos agresivos, más de 4 pases para alcanzar márgenes libres, mayor tamaño del defecto final y tumores recurrentes.<sup>46</sup> (Nivel de evidencia 2b)

Otra cohorte unicéntrica retrospectiva recoge un total de 228 carcinomas basocelulares, 87 primarios y 141 recurrentes, intervenidos entre 1983 y 1992, con una proporción del 6,5% de recurrencias en tumores primarios y del 10% en tumores recidivantes.<sup>47</sup> (Nivel de evidencia 2b).

El único ensayo clínico aleatorizado que compara cirugía de Mohs con cirugía convencional es el realizado en Holanda. Los autores reclutaron un total de 408 carcinomas basocelulares primarios de al menos 1 cm de diámetro localizados en la zona H o de subtipo histológico agresivo y 204 carcinomas basocelulares

recurrentes, de cualquier tamaño y subtipo, y de forma aleatoria les asignan tratamiento mediante cirugía de Mohs o cirugía convencional. Realizan posteriormente un seguimiento a 5 años y hacen un análisis por intención de tratar, siendo el objetivo primario la recurrencia tumoral (clínica, confirmada con la biopsia) y los objetivos secundarios las causas de fracaso y el coste-efectividad. Hay pérdida de seguimiento en 165 pacientes (127 tumores primarios y 56 tumores recurrentes). Hallaron una mayor tasa de recurrencia en tumores tratados con cirugía convencional frente a cirugía de Mohs, tanto en tumores primarios (4,1% vs 2,5%, Log-rank test  $\chi^2$  0,718,  $p=0,397$ ) como en tumores recurrentes (12,1% vs 2,4% Log-rank test  $\chi^2$  5,958,  $p=0,015$ ).<sup>48</sup> El análisis a 10 años confirma una probabilidad acumulada de recidiva del 4,4% con cirugía de Mohs y del 12,2% con cirugía convencional en tumores primarios (Log-rank test  $\chi^2$  2,704,  $p=0,100$ ) y del 3,9% con cirugía de Mohs frente al 13,5% con cirugía convencional en tumores recidivantes (Log-rank test  $\chi^2$  5,166,  $p=0,023$ ), siendo por tanto estadísticamente significativo en tumores recurrentes pero no en primarios. El diseño de este ensayo muestra problemas tales como el reflejar sólo la actividad de 4 cirujanos, y sesgos de selección<sup>49</sup> (Nivel de evidencia 1b). Muchas recurrencias ocurren más allá de los 5 años del tratamiento (56% para primario y 14% para recurrente), lo que sugiere una necesidad de seguimiento a largo plazo.

La cirugía de Mohs presenta bajas tasas de recurrencia a largo plazo y es la única técnica que nos permite evaluar el 100% de los márgenes, motivos por los que los autores la consideran como la opción más adecuada en carcinomas basocelulares de alto riesgo. Los estudios comparativos con la cirugía convencional son escasos, y aunque hay un ensayo clínico aleatorizado, sólo se confirma significación estadística en el tratamiento de los tumores recurrentes y no en los primarios.

Debido a todo esto, aunque los autores estiman que la cirugía de Mohs es la idónea en carcinomas basocelulares de alto riesgo, la poca evidencia junto a la dificultad logística para poner en marcha esta técnica en muchos hospitales no nos permite considerarla como única opción.

PREGUNTA 5. ¿En pacientes inmunodeprimidos con carcinoma basocelular de bajo riesgo el tratamiento agresivo en comparación con el tratamiento conservador influye en la probabilidad de recidiva?

## RESUMEN DE LA EVIDENCIA

No existen datos concluyentes que nos permitan afirmar que los carcinomas basocelulares en pacientes inmunodeprimidos sean de mayor riesgo que en inmunocompetentes, ni hay estudios que comparen el tratamiento quirúrgico con el tratamiento conservador en estos pacientes. Sin embargo, en las guías de la *British Association of Dermatology* y la *National Comprehensive Cancer Network* la inmunosupresión se considera un factor de mal pronóstico por sí misma.<sup>50-52</sup>

**Nivel de evidencia: 5**

## RECOMENDACIÓN DE LA AEDV

En pacientes inmunodeprimidos los carcinomas basocelulares podrían tener un carácter más agresivo, por lo que se recomienda como primera opción siempre la cirugía, relegando los tratamientos conservadores a aquellos casos no subsidiarios de tratamiento quirúrgico.

**Fuerza de la recomendación: D.**

## DISCUSIÓN

Un estudio retrospectivo recogió todas las historias de pacientes trasplantados durante un periodo de 20 años, seleccionando a aquellos que habían desarrollado carcinoma basocelular (146 pacientes con 176 carcinomas), usando como grupo control un total de 153 carcinomas basocelulares seleccionados al azar de pacientes no inmunodeprimidos de los archivos de Anatomía Patológica. La edad media de aparición del tumor fue menor en los

pacientes trasplantados (54,6 vs 69,8 años), y había mayor predominio de hombres en este grupo (4,8:1 vs 1,3:1). Los pacientes trasplantados mostraron mayor número de carcinomas basocelulares de localización extracefálica (37,5% vs 24,5%) y se detectaron más casos superficiales (33,6% vs 14,4%). No se detectaron más diferencias significativas entre ambos grupos.<sup>50</sup> (Nivel de evidencia 4)

Otro estudio retrospectivo comparó 125 carcinomas basocelulares en pacientes trasplantados renales frente a 100 carcinomas basocelulares en pacientes inmunocompetentes. Detectan más casos de subtipos micronodular e infiltrativo/morfeiforme en pacientes inmunocompetentes ( $p < 0,02$  y  $p < 0,05$ , respectivamente). Por otro lado, los pacientes inmunodeprimidos mostraron más casos del subtipo superficial ( $p < 0,001$ ). No se detectaron diferencias significativas en cuanto al pronóstico durante el seguimiento a 8 años, con una única recurrencia (1%) en el grupo de pacientes trasplantados y 4 (3,2%) en el grupo de pacientes inmunocompetentes.<sup>51</sup> (Nivel de evidencia: 4)

Un estudio retrospectivo similar comparó 123 pacientes trasplantados (344 carcinomas basocelulares) con 123 controles sanos (302 carcinomas basocelulares). Sólo detectan diferencias estadísticamente significativas en cuanto a la edad, siendo la media de edad menor en los pacientes trasplantados ( $57,1 \pm 10,7$  vs  $67,4 \pm 12,3$  años,  $p < 0,0001$ ). Los tumores en pacientes trasplantados no mostraron un carácter más agresivo y el pronóstico fue similar en ambos grupos.<sup>52</sup> (Nivel de evidencia 4)

Los estudios, de bajo nivel de evidencia, de los que disponemos no muestran diferencias que justifiquen una actitud más agresiva en el tratamiento del carcinoma basocelular en pacientes inmunodeprimidos. Sin embargo, el panel de expertos de las guías NCCN y BAD, en base a su experiencia personal, clasifica a los carcinomas basocelulares que aparecen en un paciente inmunodeprimido como de alto riesgo. Los autores pensamos que la cirugía

debería ser la primera opción al ser la que menor tasa de recurrencia tiene. No obstante, conviene individualizar el caso y plantear tratamientos no quirúrgicos cuando sea posible al igual que en pacientes inmunocompetentes.

PREGUNTA 6. ¿En pacientes con carcinoma basocelular localmente avanzado el tratamiento con vismodegib en comparación con la radioterapia produce alguna mejoría de la supervivencia global o supervivencia libre de enfermedad

## **RESUMEN DE LA EVIDENCIA**

No existen estudios que comparen vismodegib con la radioterapia en el tratamiento del carcinoma basocelular localmente avanzado en cuanto a resultados en supervivencia (global o libre de enfermedad). Los ensayos clínicos de vismodegib recogen a pacientes con carcinoma basocelular que ya han sido tratados previamente con radioterapia o se consideró la radioterapia como contraindicada o inapropiada (hipersensibilidad a radioterapia (p ej. Síndrome de Golin), limitaciones por localización tumoral o dosis acumuladas de radioterapia previa).<sup>53-57</sup>

**Nivel de evidencia:5**

## **RECOMENDACIÓN DE LA AEDV**

Vismodegib es un tratamiento eficaz en carcinomas basocelulares localmente avanzados o metastásicos. Su uso debe limitarse a aquellos casos en los que el paciente no es candidato a cirugía ya sea por inoperabilidad, múltiples recurrencias o la deformidad anticipada. Tras el tratamiento con Vismodegib, en los pacientes que lo precisen se ha de considerar la posibilidad de utilizar cirugía (incluida cirugía de Mohs) y/o radioterapia.

**Fuerza de la recomendación: D**

## **DISCUSIÓN**

Según ficha técnica, vismodegib es un fármaco indicado en el tratamiento de CBC metastásico o localmente avanzado no candidato a cirugía o radioterapia.<sup>53</sup> Esta indicación se basa en los ensayos clínicos ERIVANCE/NCT00833417<sup>54,55</sup>, NCT01160250<sup>56</sup>, y STEVIE/NCT01367665.<sup>57</sup>

En estos estudios se incluyeron pacientes con CBC localmente avanzado no candidatos a cirugía, es decir se consideraban inoperables o con contraindicación médica para cirugía. Los pacientes contraindicados para cirugía eran aquellos que cumplieran estos requisitos:

- CBC ha recurrido en la misma localización después de 2 o más procedimientos quirúrgicos y la resección con intención curativa se considera poco probable
- Se anticipa que la cirugía generaría una importante deformidad o morbilidad (p. ej. Eliminar todo o parte de una estructura facial como oreja, oído, ceja, ojo; o requiere amputación de extremidades)
- Enfermedades médicas que predisponen a un mal resultado clínico con cirugía (p ej. Diabetes con historia médica de dificultades en la cicatrización de heridas)

Se incluyeron pacientes con CBC localmente avanzado no candidatos a radioterapia, es decir o bien habían recibido previamente radioterapia, o bien se considera la radioterapia como contraindicada o inapropiada. Se consideraron como radioterapia contraindicada o inapropiada, las siguientes situaciones clínicas: hipersensibilidad a radioterapia (p ej. Síndrome de Gorlin), limitaciones por localización tumoral o dosis acumuladas de radioterapia previa. En ninguno de los ensayos clínicos se compara vismodegib con radioterapia, aunque un entre el 21 y el 28% de los pacientes de los ensayos que reciben vismodegib ya habían sido tratados previamente con radioterapia.<sup>53-57</sup> Hasta la fecha tampoco se han realizado, aparte de los ensayos clínicos, otros trabajos que comparen la eficacia de vismodegib frente a la radioterapia.

PREGUNTA 7. ¿En pacientes con carcinoma basocelular localmente avanzado e inoperable por complejidad quirúrgica, el tratamiento neoadyuvante con vismodegib en comparación con la radioterapia permite un rescate quirúrgico, o una reducción del escalón de complejidad de la cirugía que haga viable la intervención?

## **RESUMEN DE LA EVIDENCIA**

No existen estudios que comparen vismodegib con radioterapia en términos de disminución de complejidad quirúrgica. Algunos estudios sugieren que vismodegib podría ser útil en neoadyuvancia, reduciendo el tamaño tumoral y permitiendo un rescate quirúrgico del tumor.<sup>58-60</sup>

**Nivel de evidencia: 4**

## **RECOMENDACIÓN DE LA AEDV**

Aquellos casos de carcinoma basocelular localmente avanzado en los que resulte difícil el tratamiento quirúrgico del tumor, el tratamiento con vismodegib durante algunos meses podría disminuir el tamaño tumoral y permitir así un abordaje quirúrgico.

**Fuerza de la recomendación: C.**

## **DISCUSIÓN**

En un ensayo clínico los autores reclutaron a 15 pacientes con carcinomas basocelulares confirmados histopatológicamente, de más de 5 mm y subsidiarios de cirugía. Seis pacientes tenían múltiples carcinomas basocelulares (uno de ellos 21 tumores, sin cumplir criterios de síndrome de Gorlin), incluyendo en total 43 carcinomas. Dividieron los tumores en dos grupos: los que van a recibir cirugía para comparar variaciones de tamaño ("tumores diana") y los que no ("tumores no diana"), obteniendo en total 43

tumores (13 de ellos tumores diana), la mayoría de región facial (n=10). Fotografían y miden el defecto quirúrgico de los tumores diana (estiman el tamaño del tumor sumándole 2 mm a aquellos que van a ser intervenidos mediante cirugía de Mohs –suponiendo un único estadio para lograr margen libre- , y 4 mm a los que se va a practicar cirugía convencional). Comparan este defecto estimado con el defecto real final tras la cirugía. Once pacientes finalizaron el ensayo, uno perdió el seguimiento y los otros tres suspendieron vismodegib por no tolerar los efectos adversos. Se demostró una reducción del tamaño tumoral en un 27% (-45,7% a -7,9% IC95% p=0.006) tras tratamiento con vismodegib 150 mg/día. No se observó respuesta en pacientes que recibieron menos de 3 meses de tratamiento. Las principales limitaciones del estudio son la ausencia de grupo placebo, que el estudio mide el tamaño teórico, pero no el efecto real sobre la cirugía, y el tamaño de la muestra (15 pacientes, 43 tumores) que limita la generalización de los resultados e impide evaluar diferencias de respuesta a vismodegib en función del subtipo histológico.<sup>58,59</sup> (Nivel de evidencia 1b)

Un estudio retrospectivo analizó 6 casos de carcinoma basocelular tratados con vismodegib en neoadyuvancia. Los 6 pacientes eran varones de entre 47 y 65 años de edad, tres de los cuales respondieron al tratamiento en una duración media de 71 semanas, y otros tres tuvieron que suspenderlo por efectos secundarios. Se comparó la planificación quirúrgica antes y después del tratamiento con vismodegib, estimándose una resección menos extensa que la prevista inicialmente, evitación de la resección ósea en tres casos y de la mandibulectomía segmentaria en dos casos. Los casos en los que se afectaban márgenes de resección (n=2) se sometieron a radioterapia coadyuvante.<sup>60</sup> (Nivel de evidencia 4)

Estos estudios arrojan datos que sugieren que vismodegib puede ser útil como neoadyuvante en carcinomas basocelulares localmente avanzados, facilitando la cirugía y consiguiendo defectos quirúrgicos menos extensos que disminuyen la complejidad quirúrgica.

En relación con la neoadyuvancia, el estudio VISMONEO (NCT02667574: Study Evaluating the Interest of Vismodegib as Neo-adjuvant Treatment of Basal Cell Carcinoma) ya ha incluido los 55 pacientes previstos y tendrá los datos definitivos en diciembre de 2020. En resumen, las referencias son escasas y ningún estudio compara esta opción con la radioterapia. Los autores recomiendan individualizar cada caso. Vismodegib previo a la cirugía puede ser una alternativa en los casos de carcinoma basocelular localmente avanzado que vayan a requerir una cirugía compleja.

PREGUNTA 8. ¿En pacientes con carcinoma basocelular de alto riesgo el seguimiento protocolizado en comparación con el seguimiento a demanda del paciente facilita un diagnóstico precoz en caso de recidiva?

## **RESUMEN DE LA EVIDENCIA**

No existen estudios que comparen el seguimiento protocolizado frente a las revisiones a demanda en pacientes con carcinoma basocelular de alto grado, ni se ha establecido consenso sobre la frecuencia, la periodicidad ni la duración total del tiempo de seguimiento. Sin embargo, en las diferentes guías se recomienda la vigilancia a largo plazo de estos pacientes (sobre todo en pacientes con lesiones recurrentes, múltiples y de alto riesgo), con revisiones cada 6-12 meses durante los primeros 3-5 años, pudiéndose espaciar posteriormente si no aparece otro tumor cutáneo en ese periodo. Idealmente, en algunas guías, se recomiendan revisiones anuales de por vida.<sup>61,62</sup>

**Nivel de evidencia: 5**

## **RECOMENDACIÓN DE LA AEDV**

En los pacientes con carcinoma basocelular de alto riesgo, lesiones recurrentes o múltiples, se recomienda el seguimiento cada 6-12 meses durante los primeros 3-5 años, pudiéndose espaciar posteriormente.

**Fuerza de recomendación: D**

## **DISCUSIÓN**

En todos los casos, las diferentes guías del manejo del carcinoma basocelular (BAD, NCCN, EADV y EDF), recomiendan la vigilancia a largo plazo de estos

pacientes, sobre todo en los de mayor riesgo (lesiones recurrentes, múltiples y de alto riesgo) con exploraciones cutáneas completas, educación en fotoprotección y autoexploración, tanto por el riesgo de recidiva como de aparición de una nueva lesión.

La evidencia sugiere que al ser los CBC tumores de lento crecimiento, la recurrencia puede tardar más de 5 años en aparecer clínicamente y que hasta un 18% de los carcinomas basocelulares recurrentes pueden aparecer incluso más tarde.<sup>61</sup> (Nivel de evidencia 4)

En un estudio de revisión de todos los estudios publicados desde 1947 acerca de los CBC primarios (no tratados previamente) tratados mediante diferentes técnicas, menos de 1/3 de todas las recurrencias se presentaron en el primer año de seguimiento, el 50% aparecieron en los 2 primeros años y un 66% en los 3 primeros años.<sup>62</sup> (Nivel de evidencia 4)

Estos estudios señalan la necesidad de un seguimiento a largo plazo. Las tasas de recurrencia son más altas en las lesiones que ya han recurrido previamente, por lo tanto, pacientes que han tenido lesiones recurrentes (sobre todo múltiples) deberían tener seguimiento debido a su riesgo alto de nueva recurrencia y el periodo entre revisiones debería tener en cuenta la lenta tasa de crecimiento del CBC.

No hay consenso en la frecuencia ni duración del seguimiento de los pacientes con un CBC primario. La NCCN determina que la frecuencia de seguimiento debería basarse en el riesgo y tenerse en cuenta que la tasa de crecimiento del CBC es lenta y resaltan la importancia del seguimiento durante los 2 primeros años con exploraciones que deberían tener lugar al menos cada 6-12 meses en este tiempo. Según la EDF a todos los pacientes se les debería ofrecer un seguimiento anual de por vida en condiciones ideales, siendo obligatorio el

seguimiento a largo plazo en los tumores de alto riesgo, ya que la recurrencia puede tardar hasta 5 años en aparecer clínicamente.

PREGUNTA 9. ¿En pacientes con carcinoma basocelular de bajo riesgo el seguimiento protocolizado en comparación con el alta y seguimiento a demanda facilita un diagnóstico precoz en caso de recidiva?

## RESUMEN DE LA EVIDENCIA

No existen estudios que comparen el seguimiento protocolizado frente a las revisiones a demanda o el control anual en pacientes con carcinoma basocelular de bajo grado. El riesgo de recidiva en pacientes con carcinoma basocelular de bajo riesgo adecuadamente tratado es bajo. Sin embargo, los pacientes con carcinoma basocelular presentan un mayor riesgo de desarrollar nuevos tumores cutáneos, y este riesgo es mayor a corto plazo (**nivel de evidencia 2a**). Por este motivo, lo ideal sería el seguimiento periódico de todos los pacientes con carcinoma basocelular, al menos una vez al año (**nivel de evidencia 5**)<sup>61-64</sup>

## RECOMENDACIÓN DE LA AEDV

Se recomienda establecer al menos una visita de seguimiento para aconsejar al paciente sobre las medidas de fotoprotección, naturaleza del tumor y riesgo de que se desarrollen nuevas lesiones. Si fuera posible, se recomienda la vigilancia periódica anual en los pacientes con carcinoma basocelular de bajo riesgo.

**Fuerza de recomendación: D**

## DISCUSIÓN

En todos los casos, las diferentes guías del manejo del carcinoma basocelular (BAD, NCCN, EADV y EDF), recomiendan la vigilancia a largo plazo de estos pacientes. Sin embargo, este seguimiento debe ser individualizado, basado en las características del tumor, el tratamiento utilizado y el riesgo. De nuevo no

existe consenso de la frecuencia de revisiones o tiempo de seguimiento de estos pacientes. En unas guías hablan de que en casos de bajo riesgo la frecuencia de monitorización podría ser menor, pero debe realizarse. En otras resaltan que lo razonable es realizar al menos una visita para todos los CBC para aconsejarlos sobre fotoprotección, explicar el riesgo de que aparezca una nueva lesión y hacer hincapié en la autoexploración. Idealmente a todos los pacientes con un CBC se les debería ofrecer un seguimiento anual de por vida.

La evidencia sugiere que al ser los CBC tumores de lento crecimiento, la recurrencia puede tardar más de 5 años en aparecer clínicamente y que hasta un 18% de los carcinomas basocelulares recurrentes pueden aparecer incluso más tarde.<sup>61</sup> (Nivel de evidencia 4)

En un estudio de revisión de todos los estudios publicados desde 1947 acerca de los CBC primarios (no tratados previamente) tratados mediante diferentes técnicas, menos de 1/3 de todas las recurrencias se presentaron en el primer año de seguimiento, el 50% aparecieron en los 2 primeros años y un 66% en los 3 primeros años.<sup>62</sup> (Nivel de evidencia 4)

Además de la recurrencia del tumor intervenido, el riesgo de nuevos tumores puede afectar la decisión sobre el seguimiento más adecuado. En un estudio de cohortes prospectivo, de base poblacional, un 27% de los pacientes desarrollaron un segundo basocelular con una mediana de seguimiento de 3 años. Este artículo incluye un modelo predictivo, que tiene en cuenta la edad, sexo, fototipo, consumo de café, número y localización de basocelulares al diagnóstico y previos, y si estos son superficiales. El número de basocelulares previos es el mejor predictor de riesgo de nuevos basocelulares.<sup>63</sup> (Nivel de evidencia 1b)

Según la BAD, en un CBC primario tratado adecuadamente por médicos experimentados, la tasa de recurrencia debería ser baja. Si el tratamiento realizado ha sido seleccionado adecuadamente y realizado correctamente, estos pacientes por definición deberían ser de bajo riesgo de recurrencia y serían posiblemente adecuados, con la adecuada educación y consejo, de autoexploración o seguimiento en atención primaria.<sup>64</sup> De todas formas, el riesgo de siguientes basocelulares puede ser importante para tomar esta decisión, y puede ser elevado y predecible<sup>63</sup>, por lo que debe tenerse en cuenta a la hora de determinar el seguimiento más adecuado.

PREGUNTA 10. ¿En pacientes con carcinoma basocelular de bajo riesgo tratado con técnicas no quirúrgicas el seguimiento protocolizado en comparación con la consulta a demanda del paciente facilita un diagnóstico precoz en caso de recidiva?

## **RESUMEN DE LA EVIDENCIA**

No hay estudios que comparen el seguimiento protocolizado con la consulta a demanda del paciente en cuanto al diagnóstico precoz en caso de recidiva. Hay que tener en cuenta que los tratamientos no quirúrgicos se van a emplear fundamentalmente en carcinomas basocelulares de bajo riesgo, si bien estas modalidades terapéuticas presentan tasas de recurrencia mayores que la cirugía convencional.<sup>65,66</sup>

**Nivel de evidencia:5**

## **RECOMENDACIÓN DE LA AEDV**

Al no existir evidencia suficiente que respalde un protocolo de seguimiento en estos casos, extrapolaríamos las recomendaciones de seguimiento de los carcinomas basocelulares de bajo riesgo.

**Fuerza de recomendación: D**

## **DISCUSIÓN**

No existen estudios que comparen la tasa de detección precoz de recidivas al realizar seguimiento protocolizado frente a la consulta a demanda del paciente, en enfermos con carcinoma basocelular de bajo riesgo tratados con técnicas no quirúrgicas. La evidencia de la que se dispone hasta la fecha está basada en la opinión de expertos sin evaluación crítica explícita.

El panel de expertos que redactó las guías de práctica clínica National Comprehensive Cancer Network (NCCN) recomienda seguimiento clínico en todos los casos, con una frecuencia individualizada según el riesgo del tumor. Las revisiones deberán ser periódicas e incluir una exploración física de toda la piel del paciente. Estos autores consideran que el monitorizar a los pacientes durante los primeros 2 años es esencial, con revisiones cada 6-12 meses. Posteriormente, si el paciente no ha desarrollado cáncer cutáneo, las revisiones podrían espaciarse.<sup>65</sup>

Por otro lado, los expertos que elaboraron de las guías europeas de tratamiento con terapia fotodinámica aconsejan que los pacientes con carcinoma basocelular nodular tratados con esta técnica sean revisados durante al menos un año para detectar posibles recurrencias.<sup>66</sup>

Debido a la falta de evidencia científica que apoye un protocolo de seguimiento en pacientes con carcinoma basocelular de bajo riesgo tratados con técnicas no quirúrgicas, se ha decidido extrapolar las recomendaciones de seguimiento de los carcinomas basocelulares de bajo riesgo.

PREGUNTA 11. ¿En pacientes con diagnóstico previo de carcinoma basocelular el seguimiento protocolizado en comparación con la consulta a criterio del paciente facilita un diagnóstico precoz en caso de nuevos carcinomas basocelulares?

## RESUMEN DE LA EVIDENCIA

Todos los pacientes con carcinoma basocelular presentan un mayor riesgo de desarrollar nuevos carcinomas basocelulares, carcinomas epidermoides y melanoma, y este riesgo es mayor en los primeros 3-5 años (**nivel de evidencia 2a**). El número de basocelulares previos es el mejor predictor de riesgo de nuevos basocelulares (**nivel de evidencia 1b**). Por este motivo, algunos expertos recomiendan el seguimiento periódico de todos los pacientes con carcinoma basocelular, al menos una vez al año (**nivel de evidencia 5**).<sup>63,67-80</sup>

## RECOMENDACIÓN DE LA AEDV

Se recomienda establecer al menos una visita de seguimiento para aconsejar al paciente sobre medidas de fotoprotección, explicar el riesgo de que se desarrollen nuevas lesiones y la importancia de la auto-vigilancia. Si el sistema de salud lo permite, se recomienda la vigilancia periódica en los pacientes con carcinoma basocelular, con una periodicidad al menos anual.

**Fuerza de recomendación: D**

## DISCUSIÓN

Riesgo de presentar un nuevo CBC:

Diferentes estudios demuestran que los pacientes que han tenido un CBC tienen un mayor riesgo de desarrollar otros tumores cutáneos. Un estudio de revisión y metaanálisis determinó que el riesgo acumulativo de desarrollar un segundo CBC a 3 años varía entre 33 y el 70% (media 44), representando un aumento del riesgo 10 veces mayor de lo esperado comparando con la

población general.<sup>67</sup> Un estudio de los datos del registro Suizo de cáncer sugirió que el riesgo de un segundo CBC en pacientes con antecedentes de estas neoplasias es 8,45 veces más alto comparado con población general.<sup>68</sup> Otro estudio de cohortes prospectivo poblacional encontró que el desarrollo de un segundo CBC es más probable durante el periodo de seguimiento a corto plazo después del diagnóstico del primer CBC.<sup>69</sup> Así mismo, el riesgo de desarrollar un nuevo CBC es mayor (60-70%) para pacientes con antecedente de 2 o más carcinomas basocelulares, pero el riesgo disminuye en aquellos pacientes que se mantienen libres de enfermedad a los 3 años.<sup>67</sup> En esta misma línea, otros trabajos estiman el riesgo de desarrollo de un nuevo CBC a los 5 años entre el 30-50%.<sup>70-74</sup> Además del riesgo de desarrollo de un segundo CBC, los pacientes diagnosticados de CBC también tienen un mayor riesgo de desarrollar carcinoma espinocelular y melanoma.<sup>70,71</sup>

#### Factores de riesgo para el desarrollo de un nuevo CBC:

Hasta hace poco, no se habían caracterizado bien los factores de riesgo concretos que confieren una mayor predisposición a presentar un nuevo CBC.

El grupo de Ramachandran diseñó un estudio de cohortes con 927 casos, en el que se sugirió que la presencia de múltiples CBC inicialmente se asocia a mayor riesgo de CBC futuro.<sup>75</sup> Posteriormente, el mismo grupo reportó que el hecho de que el CBC índice aparezca en el tronco puede estar relacionado con una predisposición a este tipo de tumores. La localización del CBC índice en tronco se asocia fuertemente con el desarrollo de otro CBC, localizado también más frecuentemente en el tronco.<sup>76</sup>

Se ha descrito que el riesgo de desarrollar nuevos CBCs parece mayor en pacientes con más de 60 años al inicio, de sexo masculino,<sup>77,78</sup> con presentación inicial con múltiples CBC, que presenten un tamaño tumoral mayor de 1 cm,<sup>78,79</sup> con el primer CBC localizado en tronco y con el subtipo histológico superficial.<sup>77,78</sup>

Recientemente se ha publicado un estudio de cohortes prospectivo, de base poblacional, en el que un 27% de los pacientes desarrollaron un segundo CBC

con una mediana de seguimiento de 3 años. Este artículo incluye un modelo predictivo que tiene en cuenta la edad, sexo, fototipo, consumo de café, número y localización de basocelulares al diagnóstico y previos, y si estos son de subtipo histológico superficial. De todos los factores de riesgo descritos, concluyen que el número de basocelulares previos es el mejor predictor de riesgo de nuevos CBC.<sup>63</sup>

#### Recomendaciones para el seguimiento de los pacientes con CBC:

En vista de los resultados de los estudios anteriores, es esencial un seguimiento y vigilancia de todos los pacientes con CBC, así como la educación en fotoprotección y en la auto-exploración, y basar la periodicidad del mismo en el riesgo individualizado de cada tumor. Esta práctica es importante, ya que un paciente que ha sido tratado de un CBC tiene riesgo tanto de una nueva lesión primaria como de fallo del tratamiento y aparición de una recurrencia local.

Las guías de práctica clínica de la National Comprehensive Cancer Network (NCCN) resaltan la importancia del seguimiento durante los 2 primeros años con exploraciones que deberían tener lugar al menos cada 6-12 meses en este tiempo.<sup>65</sup>

Por otro lado, el European Dermatology Forum (EDF) afirma que a todos los pacientes se les debería ofrecer un seguimiento anual de por vida, siendo obligatorio el seguimiento a largo plazo en los tumores de alto riesgo. Sin embargo, si esto no fuera posible para algunos sistemas de salud públicos, el seguimiento clínico debería realizarse cada 6-12 meses durante 3-5 años en los siguientes supuestos: pacientes de alto riesgo de recurrencia, aquellos que ya han sido tratados de recurrencia y en aquellos con historia de múltiples CBC.<sup>17</sup>

Así mismo, las guías de práctica clínica británicas también inciden en la necesidad del seguimiento estrecho durante al menos 3 años en pacientes tratados de enfermedad recurrente (que presentan un mayor riesgo de

recurrencia tras cualquier modalidad terapéutica) y con antecedente de múltiples CBC (que presentan un riesgo aumentado de nuevos CBC).<sup>80</sup>

## BIBLIOGRAFIA

1. Tejera-Vaquerizo A, Descalzo-Gallego MA, Otero-Rivas MM, Posada-García C, Rodríguez-Pazos L, Pastushenko I, et al. Skin Cancer Incidence and Mortality in Spain: A Systematic Review and Meta-Analysis. *Actas Dermosifiliogr*. 2016;107:318-28.
2. Buendía-Eisman A, Arias-Santiago S, Molina-Leyva A, Gilaberte Y, Fernández-Crehuet P, Husein-ElAhmed H, et al. Outpatient Dermatological Diagnoses in Spain: Results From the National DIADERM Random Sampling Project. *Actas Dermosifiliogr* 2018;109:416-23.
3. Grupo de trabajo sobre actualización de GPC. Actualización de Guías de Práctica Clínica en el Sistema Nacional de Salud. Manual Metodológico. Plan de Calidad para el Sistema Nacional de Salud del Ministerio de Sanidad y Política Social. Instituto Aragonés de Ciencias de la Salud-I+CS; 2009. Guías de Práctica Clínica en el SNS: I+CS Nº 2007/02-01
4. Fervers B, Burgers JS, Voellinger R, Brouwers M, Browman GP, Graham ID, et al. Guideline adaptation: an approach to enhance efficiency in guideline development and improve utilisation. *BMJ Qual Saf*. 2011;20:228-36.
5. Brouwers MC, Kho ME, Browman GP, Burgers JS, Cluzeau F, Feder G, et al. AGREE II: advancing guideline development, reporting and evaluation in health care. *J Clin Epidemiol*. 2010;63:1308-11
6. Oxford Centre for Evidence-based Medicine – Levels of Evidence (March 2009) [Consultado el 21 Jun 2018]. Disponible en: <https://www.cebm.net/2009/06/oxford-centre-evidence-based-medicine-levels-evidence-march-2009/>
7. Nagore E, Grau C, Molinero J, Fortea JM. Positive margins in basal cell carcinoma: relationship to clinical features and recurrence risk. A retrospective study of 248 patients. *J Eur Acad Dermatol Venereol*. 2003;17:167-70.
8. De Silva SP, Dellon AL. Recurrence rate of positive margin basal cell

carcinoma: results of a five-year prospective study. *J Surg Oncol*. 1985;28:72–4.

9. Park AJ, Strick M, Watson JD. Basal cell carcinomas: do they need to be followed up? *J R Coll Surg Edinb*. 1994;39:109–11.

10. Sei JF. Excision limits and reoperation in cutaneous carcinoma. *Ann Dermatol Venereol*. 1997;124:421–6.

11. Wilson AW, Howsam G, Santhanam V, Macpherson D, Grant J, Pratt CA, et al. Surgical management of incompletely excised basal cell carcinomas of the head and neck. *Br J Oral Maxillofac Surg*. 2004;42:311–4.

12. Boulinguez S, Grison-Tabone C, Lamant L, Valmary S, Viraben R, Bonnetblanc JM, et al. Histological evolution of recurrent basal cell carcinoma and therapeutic implications for incompletely excised lesions. *Br. J. Dermatol*. 2004;151:623–6.

13. Robinson JK, Fisher SG. Recurrent basal cell carcinoma after incomplete resection. *Arch Dermatol*. 2000;136:1318–24.

14. Bielely HC, Kirsner RS, Reyes BA, Garland LD. The use of Mohs micrographic surgery for determination of residual tumor in incompletely excised basal cell carcinoma. *J. Am. Acad. Dermatol*. 1992;26(5 Pt 1):754–6.

15. Liu FF, Maki E, Warde P, Payne D, Fitzpatrick P. A management approach to incompletely excised basal cell carcinomas of skin. *Int J Radiat Oncol Biol Phys* 1991; 20:423–8.

16. Caccialanza M, Piccinno R, Grammatica A. Radiotherapy of recurrent basal and squamous cell skin carcinomas: a study of 249 retreated carcinomas in 229 patients. *Eur J Dermatol* 2001; 11:25–8.

17. Trakatelli M, Morton C, Nagore E, et al. Update of the European guidelines for basal cell carcinoma management. *Eur J Dermatol*. 2014;24:312-29.

18. Jackson JE, Dickie GJ, Wiltshire KL, Keller J, Tripcony L, Poulsen MG, Hughes M, Allison RW, Martin JM. Radiotherapy for perineural invasion in

cutaneous head and neck carcinomas: toward a risk-adapted treatment approach. *Head Neck*. 2009;31:604-10.

19. Walker P, Hill D. Surgical treatment of basal cell carcinomas using standard postoperative histological assessment. *Australas J Dermatol* 2006; 47:1–12.

20. Marchac D, Papadopoulos O, Duport G. Curative and aesthetic results of surgical treatment of 138 basal-cell carcinomas. *J Dermatol Surg Oncol* 1982; 8:379–87.

21. Griffiths RW, Suvarna SK, Stone J. Do basal cell carcinomas recur after complete conventional surgical excision? *Br J Plast Surg* 2005; 58:795–805.

22. Barlow JO, Zalla MJ, Kyle A et al. Treatment of basal cell carcinoma with curettage alone. *J Am Acad Dermatol* 2006; 54:1039–45.

23. Spiller WF, Spiller RF. Treatment of basal cell epithelioma by curettage and electrodesiccation. *J Am Acad Dermatol* 1984; 11:808–14.

24. Kopf AW, Bart RS, Schrager D et al. Curettage-electrodesiccation treatment of basal cell carcinomas. *Arch Dermatol* 1977; 113:439–43.

25. Carlson KC, Connolly SM, Winkelmann RK. Basal cell carcinoma on the lower extremity. *J Dermatol Surg Oncol* 1994; 20:258–9.

26. Suhge d'Aubermont PC, Bennett RG. Failure of curettage and electrodesiccation for removal of basal cell carcinoma. *Arch Dermatol* 1984; 120:1456–60.
27. Kokoszka A, Scheinfeld N. Evidence-based review of the use of cryosurgery in treatment of basal cell carcinoma. *Dermatol Surg* 2003; 29:566–71.
28. Bernardeau K, Derancourt C, Cambie M et al. Cryosurgery of basal cell carcinoma: a study of 358 patients. *Ann Dermatol Venereol* 2000; 127:175–9.
29. Kuflik EG, Gage AA. The five-year cure rate achieved by cryosurgery for skin cancer. *J Am Acad Dermatol* 1991; 24:1002–4.
30. Kuflik EG. Cryosurgery for skin cancer: 30-year experience and cure rates. *Dermatol Surg* 2004; 30:297–300.
31. Hall VL, Leppard BJ, McGill J, Kessler ME, White JE, Goodwin P. Treatment of basal-cell carcinoma: comparison of radiotherapy and cryotherapy. *Clin Radiol*. 1986;37:33– 4.
32. Jaramillo-Ayerbe F. Cryosurgery in difficult to treat basal cell carcinoma. *Int. J. Dermatol*. 2000;39:223–9.
33. Tuppurainen K. Cryotherapy for eyelid and periocular basal cell carcinomas: outcome in 166 cases over an 8-year period. *Graefes Arch. Clin. Exp. Ophthalmol*. 1995;233:205– 8.

34. Nouri K, Chang A, Trent JT, Jimenez GP. Ultrapulse CO<sub>2</sub> used for the successful treatment of basal cell carcinomas found in patients with basal cell nevus syndrome. *Dermatol Surg* 2002; 28:287–90.
  
35. Geisse J, Caro I, Lindholm J et al. Imiquimod 5% cream for the treatment of superficial basal cell carcinoma: results from two phase III, randomized, vehicle-controlled studies. *J Am Acad Dermatol* 2004; 50:722–33.
  
36. Vanaclocha F, Dauden E, Badia X, Guillen C, Conejo Mir J, Sainz de los Terreros M, Hamel L, Llorens M Cost-effectiveness of treatment of superficial basal cell carcinoma: surgical excision vs. imiquimod 5% cream. *Br J Dermatol*. 2007;156:769-71.
  
37. Rhodes LE, de Rie M, Enström Y et al. Photodynamic therapy using topical methyl aminolevulinate vs surgery for nodular basal cell carcinoma. Results of a multicenter randomized prospective trial. *Arch Dermatol* 2004; 140:17–23.
  
38. Rhodes LE, de Rie MA, Leifsdottir R et al. Five year follow-up of a randomized, prospective trial of methyl aminolevulinate photodynamic therapy vs surgery for nodular basal cell carcinoma. *Arch Dermatol* 2007; 143:1131–6.
  
39. de Haas ER, de Vijlder HC, Sterenborg HJ et al. Fractionated aminolevulinic acid-photodynamic therapy provides additional evidence for the use of PDT for non-melanoma skin cancer. *J Eur Acad Dermatol Venereol* 2008; 22: 426–30.

40. Mosterd K, Thissen MRTM, Nelemans P et al. Fractionated 5-aminolaevulinic acid-photodynamic therapy vs. surgical excision in the treatment of nodular basal cell carcinoma: results of a randomized controlled trial. *Br J Dermatol* 2008; 159: 864-70.
  
41. Szeimies R, Ibbotson S, Murrell D et al. A clinical study comparing methyl aminolevulinate photodynamic therapy and surgery in small superficial basal cell carcinoma (8–20mm), with a 12-month followup. *J Eur Acad Dermatol Venereol* 2008; 22: 1302–11.
  
42. Berroeta L, Clark C, Dawe RS et al. A randomized study of minimal curettage followed by topical photodynamic therapy compared with surgical excision for low risk nodular BCC. *Br J Dermatol* 2007; 157: 401–3.
  
43. Rowe DE, Carroll RJ, Jr. Day CL. Long-Term Recurrence Rates in Previously Untreated (Primary) Basal Cell Carcinoma: Implications for Patient Follow-Up. *J Dermatol Surg Oncol.* 1989;15:315-28.
  
44. Malhotra R, Huilgol SC, Huynh NT, Selva D. The Australian Mohs database, part II: Periocular basal cell carcinoma outcome at 5-year follow-up. *Ophthalmology.* 2004;111:631-6.
  
45. Leibovitch I, Huilgol SC, Selva D, Richards S, Paver R. Basal cell carcinoma treated with Mohs surgery in Australia II. Outcome at 5-year follow-up. *J Am Acad Dermatol.* 2005;53:452-7.
  
46. Smeets N w. j., Kuijpers D i. m., Nelemans P, Ostertag J u., Verhaegh M e. j. m., Krekels G a. m., et al. Mohs' micrographic surgery for treatment of basal cell carcinoma of the face——results of a retrospective study and review of the literature. *Br J Dermatol.* 2004;151:141-7.

47. Wennberg AM, Larkö O, Stenquist B. Five-year results of Mohs' micrographic surgery for aggressive facial basal cell carcinoma in Sweden. *Acta Derm Venereol.* 1999;79:370-2.
48. Mosterd K, Krekels GA, Nieman FH, Ostertag JU, Essers BA, Dirksen CD, et al. Surgical excision versus Mohs' micrographic surgery for primary and recurrent basal-cell carcinoma of the face: a prospective randomised controlled trial with 5-years' follow-up. *Lancet Oncol.* 2008;9:1149-56.
49. Loo E van, Mosterd K, Krekels GAM, Roozeboom MH, Ostertag JU, Dirksen CD, et al. Surgical excision versus Mohs' micrographic surgery for basal cell carcinoma of the face: A randomised clinical trial with 10 year follow-up. *Eur J Cancer.* 2014;50:3011-20.
50. Kanitakis J, Alhaj-Ibrahim L, Euvrard S, Claudy A. Basal Cell Carcinomas Developing in Solid Organ Transplant Recipients: Clinicopathologic Study of 176 Cases. *Arch Dermatol.* 2003;139:1133-7.
51. Harwood CA, Proby CM, McGregor JM, Sheaff MT, Leigh IM, Cerio R. Clinicopathologic features of skin cancer in organ transplant recipients: A retrospective case-control series. *J Am Acad Dermatol.* 2006;54:290-300.
52. Lott DG, Manz R, Koch C, Lorenz RR. Aggressive Behavior of Nonmelanotic Skin Cancers in Solid Organ Transplant Recipients. *Transplantation.* 2010;90:683-7.
53. Ficha técnica de vismodegib. [consultado 25 May 2017]. Disponible en: [http://www.ema.europa.eu/docs/es\\_ES/document\\_library/EPAR\\_Product\\_Information/human/002602/WC500146817.pdf](http://www.ema.europa.eu/docs/es_ES/document_library/EPAR_Product_Information/human/002602/WC500146817.pdf).

54. Sekulic A, Migden MR, Oro AE, Dirix L, Lewis KD, Hainsworth JD, et al. Efficacy and safety of vismodegib in advanced basal-cell carcinoma. *N Engl J Med* 2012;366:2171–9.

55. Sekulic A, Migden MR, Lewis K, Hainsworth JD, Solomon JA, Yoo S, et al. Pivotal ERIVANCE basal cell carcinoma (BCC) study: 12-month update of efficacy and safety of vismodegib in advanced BCC. *J Am Acad Dermatol* 2015;72:1021-6.

56. Chang AL, Solomon JA, Hainsworth JD, Goldberg L, McKenna E, Day BM, et al. Expanded access study of patients with advanced basal cell carcinoma treated with the Hedgehog pathway inhibitor , vismodegib. *J Am Acad Dermatol*. 2014;70:60-9.

57. Basset-Seguin N, Hauschild A, Grob JJ, Kunstfeld R, Dréno B, Mortier L, et al. Vismodegib in patients with advanced basal cell carcinoma (STEVE): a pre-planned interim analysis of an international, open-label trial. *Lancet Oncol* 2015;16:729-36.

58. Ally MS, Aasi S, Wysong A, Teng C, Anderson E, Bailey-Healy I, et al. An investigator-initiated open-label clinical trial of vismodegib as a neoadjuvant to surgery for high-risk basal cell carcinoma. *J Am Acad Dermatol*. 2014;71:904-911.e1.

59. Kwon GP, Ally MS, Bailey-Healy I, Oro AE, Kim J, Chang AL, et al. Update to an open-label clinical trial of vismodegib as neoadjuvant before surgery for high-risk basal cell carcinoma (BCC). *J Am Acad Dermatol*. 2016;75:213-5.

60. Ching JA, Curtis HL, Braue JA, Kudchadkar RR, Mendoza TI, Messina JL, et al. The impact of neoadjuvant hedgehog inhibitor therapy on the surgical treatment of extensive basal cell carcinoma. *Ann Plast Surg*. 2015;74 Suppl 4:S193-197.

61. Silverman MK, Kopf AW, Grin CM et al. Recurrence rates of treated basal cell carcinomas. Part 2: curettage-electrodesiccation. *J Dermatol Surg Oncol* 1991;14:720-6.

62. Rowe DE, Carroll RJ, Day CL Jr et al. Long-term recurrence rates in previously untreated (primary) basal cell carcinoma: implications for patient follow up. *J Dermatol Surg Oncol* 1989; 15:315.28.

63. Smedinga H, Verkouteren JAC, Steyerberg EW et al. Occurrence of metachronous basal cell carcinomas: a prognostic model. *Br J Dermatol*. 2017 Oct;177(4):1113-1121.

64. Park AJ, Strick M, Watson JD. Basal cell carcinomas: do they need to be followed up? *J R Coll Surg Edinb* 1994; 39:109-11.

65. National Comprehensive Cancer Network. NCCN Guideline for Treatment of Basal Cell Skin Cancer. Disponible de: URL: [http://www.nccn.org/professionals/physician\\_gls/pdf/nmsc/pdf](http://www.nccn.org/professionals/physician_gls/pdf/nmsc/pdf). Acceso el 16 de mayo de 2017.

66. Morton CA, Szeimies RM, Sidoroff A, et al. European guidelines for topical photodynamic therapy part 1: treatment delivery and current indications - actinic

keratoses, Bowen's disease, basal cell carcinoma. *J Eur Acad Dermatol Venereol*. 2013;27:536-44.

67. Marcil I, Stern RS. Risk of developing a subsequent nonmelanoma skin cancer in patients with a history of nonmelanoma skin cancer: a critical review of the literature and meta-analysis. *Arch Dermatol*. 2000;136:1524-30.

68. Levi F, Randimbison L, Maspoli M et al. High incidence of second basal cell skin cancers. *Int J Cancer* 2006; 119:1505–7.

69. Kiiski V, de Vries E, Flohil SC, et al. Risk factors for single and multiple basal cell carcinomas. *Arch Dermatol*. 2010;146:848-55.

70. Karagas MR, Stukel TA, Greenberg ER, et al. Risk of subsequent basal cell carcinoma and squamous cell carcinoma of the skin among patients with prior skin cancer. Skin Cancer Prevention Study Group. *JAMA*. 1992;267:3305-10.

71. Flohil SC, Koljenović S, de Haas ER, et al. Cumulative risks and rates of subsequent basal cell carcinomas in the Netherlands. *Br J Dermatol*. 2011;165:874-81.

72. Robinson JK. Follow-up and prevention (basal cell carcinoma). In: Miller SJ, Maloney ME, eds. *Cutaneous Oncology Pathophysiology, diagnosis and management*. Malden, MA:Blackwell Science;1998:695-8.

73. Ramachandran S, Rajaratnam R, Smith AG, et al. Patients with both basal and squamous cell carcinomas are at a lower risk of further basal cell

carcinomas than patients with only a basal cell carcinoma. *J Am Acad Dermatol*. 2009;61:247-51.

74. Flohil SC, van der Leest RJ, Arends LR, et al. Risk of subsequent cutaneous malignancy in patients with prior keratinocyte carcinoma: a systematic review and meta-analysis. *Eur J Cancer*. 2013;49:2365-75.

75. Ramachandran S, Fryer AA, Smith AG et al. Basal cell carcinoma. *Cancer* 2000; 89:1012–18.

76. Ramachandran S, Fryer AA, Smith A et al. Cutaneous basal cell carcinomas: distinct host factors are associated with the development of tumors on the trunk and head and neck. *Cancer* 2001; 92:354–8.

77. Lovatt TJ, Lear JT, Bastrilles J, et al. Associations between ultraviolet radiation, basal cell carcinoma site and histology, host characteristics, and rate of development of further tumors. *J Am Acad Dermatol*. 2005;52(3 Pt 1):468-73.

78. Verkouteren JA, Smedinga H, Steyerberg EW et al. Predicting the risk of a second basal cell carcinoma. *J Invest Dermatol* 2015;135:2649–56.

79. van Iersel CA, van de Velden HV, Kusters CD et al. Prognostic factors for a subsequent basal cell carcinoma: implications for follow up. *Br J Dermatol*. 2005; 153:1078–80.

80. Telfer NR, Colver GB, Morton CA. Guidelines for the management of basal cell carcinoma. *Br J Dermatol*. 2008;159:35-48.
